# Supplementary material
Source: HighWire-hosted journal article supplement (https://svn.smart01.highwire.org/content/9/5/481)
Supplement: inline-supplementary-material-1 [file inline-supplementary-material-1.pdf]

Table S1. Information on scoring each metric of Life’s Essential 8.

| Metric                | Method of measurement                                                                                                                                                                                                         | Scoring rubric                                                                       |                                                             |
|-----------------------|-------------------------------------------------------------------------------------------------------------------------------------------------------------------------------------------------------------------------------|--------------------------------------------------------------------------------------|-------------------------------------------------------------|
| Diet                  | Mediterranean Eating Pattern for Americans (MEPA)                                                                                                                                                                             | Points                                                                               | MEPA score (points)                                         |
|                       |                                                                                                                                                                                                                               | 100                                                                                  | 6                                                           |
|                       |                                                                                                                                                                                                                               | 80                                                                                   | 5                                                           |
|                       |                                                                                                                                                                                                                               | 50                                                                                   | 4                                                           |
|                       |                                                                                                                                                                                                                               | 25                                                                                   | 3                                                           |
|                       |                                                                                                                                                                                                                               | 0                                                                                    | 0-2                                                         |
| Physical activity     | Minutes of moderate (or greater) intensity activity per week<br><br>(Each minute of moderate activity should count as 1 minute and each minute of vigorous activity should count as 2 minutes toward the total for the week.) | Scoring                                                                              | Points Minutes                                              |
|                       |                                                                                                                                                                                                                               | 100                                                                                  | ≥150                                                        |
|                       |                                                                                                                                                                                                                               | 90                                                                                   | 120 – 149                                                   |
|                       |                                                                                                                                                                                                                               | 80                                                                                   | 90 – 119                                                    |
|                       |                                                                                                                                                                                                                               | 60                                                                                   | 60 – 89                                                     |
|                       |                                                                                                                                                                                                                               | 40                                                                                   | 30 – 59                                                     |
|                       |                                                                                                                                                                                                                               | 20                                                                                   | 1 – 29                                                      |
|                       |                                                                                                                                                                                                                               | 0                                                                                    | 0                                                           |
| Nicotine exposure     | Combustible tobacco used and/or inhaled NDS use; or secondhand smoke exposure                                                                                                                                                 | Scoring                                                                              | Points Status                                               |
|                       |                                                                                                                                                                                                                               | 100                                                                                  | Never smoker                                                |
|                       |                                                                                                                                                                                                                               | 75                                                                                   | Former smoker, quit ≥5 years                                |
|                       |                                                                                                                                                                                                                               | 50                                                                                   | Former smoker, quit 1 -<5 years                             |
|                       |                                                                                                                                                                                                                               | 25                                                                                   | Former smoker, quit <1 year, or currently using inhaled NDS |
|                       |                                                                                                                                                                                                                               | 0                                                                                    | current smoker                                              |
| Sleep health          | Average hours of sleep per night                                                                                                                                                                                              | subtract 20 points (unless score is 0) for living with active indoor smoker in home. |                                                             |
|                       |                                                                                                                                                                                                                               | Scoring                                                                              | Points Level                                                |
|                       |                                                                                                                                                                                                                               | 100                                                                                  | 7 – <9                                                      |
|                       |                                                                                                                                                                                                                               | 90                                                                                   | 9 -<10                                                      |
|                       |                                                                                                                                                                                                                               | 70                                                                                   | 6 -<7                                                       |
|                       |                                                                                                                                                                                                                               | 40                                                                                   | 5 -<6 or ≥10                                                |
|                       |                                                                                                                                                                                                                               | 20                                                                                   | 4 -<5                                                       |
|                       |                                                                                                                                                                                                                               | 0                                                                                    | <4                                                          |
| Body mass index (BMI) | Body weight (kg) divided by height squared (m <sup>2</sup> )                                                                                                                                                                  | Scoring                                                                              | Points Level                                                |
|                       |                                                                                                                                                                                                                               | 100                                                                                  | <25                                                         |
|                       |                                                                                                                                                                                                                               | 70                                                                                   | 25.0-29.9                                                   |
|                       |                                                                                                                                                                                                                               | 30                                                                                   | 30.0-34.9                                                   |
|                       |                                                                                                                                                                                                                               | 15                                                                                   | 35.0-39.9                                                   |
|                       |                                                                                                                                                                                                                               | 0                                                                                    | ≥40.0                                                       |

|                                            |                                                                                          |         |                                                                 |
|--------------------------------------------|------------------------------------------------------------------------------------------|---------|-----------------------------------------------------------------|
|                                            |                                                                                          | Scoring | Points Level                                                    |
| Blood lipids                               | Non-HDL-cholesterol (mg/dL) = Plasma total cholesterol (mg/dL) - HDL-cholesterol (mg/dL) | 100     | <130                                                            |
|                                            |                                                                                          | 60      | 130-159                                                         |
|                                            |                                                                                          | 40      | 160-189                                                         |
|                                            |                                                                                          | 20      | 190-219                                                         |
|                                            |                                                                                          | 0       | ≥220                                                            |
| If drug-treated level, subtract 20 points. |                                                                                          |         |                                                                 |
|                                            |                                                                                          | Scoring | Points Level                                                    |
| Blood glucose                              | Fasting blood glucose (mg/dL) or Hemoglobin A1c (%)                                      | 100     | No history of diabetes and FBG < 100 (or HbA1c< 5.7)            |
|                                            |                                                                                          | 60      | No diabetes and FBG 100 – 125 (or HbA1c 5.7-6.4) (Pre-diabetes) |
|                                            |                                                                                          | 40      | Diabetes with HbA1c <7.0                                        |
|                                            |                                                                                          | 30      | Diabetes with HbA1c 7.0-7.9                                     |
|                                            |                                                                                          | 20      | Diabetes with HbA1c 8.0-8.9                                     |
|                                            |                                                                                          | 10      | Diabetes with HbA1c 9.0-9.9                                     |
|                                            |                                                                                          | 0       | Diabetes with HbA1c ≥10.0                                       |
|                                            |                                                                                          | Scoring | Points Level                                                    |
| Blood pressure                             | Systolic and diastolic blood pressure (mm Hg)                                            | 100     | <120/80 (optimal)                                               |
|                                            |                                                                                          | 75      | 120-129/<80 (elevated)                                          |
|                                            |                                                                                          | 50      | 130-139 or 80-89 (stage 1 hypertension)                         |
|                                            |                                                                                          | 25      | 140-159 or 90-99                                                |
|                                            |                                                                                          | 0       | ≥160 or ≥100                                                    |
| Subtract 20 points if treated level.       |                                                                                          |         |                                                                 |

\*Cannot meet these metrics until solid foods are being consumed

Table S2. Scanner parameters of MRI sequences

| Contrast      | Orientation | Voxel /mm <sup>3</sup> | Parameters                                                                  | Scan time |
|---------------|-------------|------------------------|-----------------------------------------------------------------------------|-----------|
| T1w MPRAGE    | 3D sagittal | 1.00×1.00×1.00         | TE=3.0ms, TR=6.7ms, TI=880ms,<br>shot interval=2000ms, Flip angle=8°        | 4:30      |
| SWI           | 3D axial    | 0.63×0.63×0.80         | first TE=7.2ms, echo spacing = 6.2ms,<br>5 echoes, Flip angle=17°, TR =37ms | 2:20      |
| FLAIR imaging | 2D axial    | 0.53×0.53×6.50         | TE=110ms, TR=7000ms, TI=2300ms,<br>SPIR fat suppression                     | 2:27      |
| T2w imaging   | 2D axial    | 0.51×0.51×6.50         | TE=105ms, TR=2500ms,<br>SPIR fat suppression                                | 1:05      |

T1w MPRAGE indicates T1-weighted magnetization prepared rapid acquisition gradient-echo; SWI, susceptibility-weighted imaging; FLAIR, fluid-attenuated inversion recovery; T2w, T2-weighted.
